# Supplementary material for: Indirect read-out of the promoter DNA by RNA polymerase in the closed complex
Source: PubMed Central journal article supplement — Nucleic Acids Res. 2012 Oct 31;41(1):366–77. doi: 10.1093/nar/gks1018 (PMC3592454; doi:10.1093/nar/gks1018), 2012-10-31

Figure S1: Binding isotherm of RNA polymerase to the 21-mer (A) galP1 oligonucleotide (P1-21) (B) Triple mutant galP1 (P-21-TripleM) at 4°C.

A

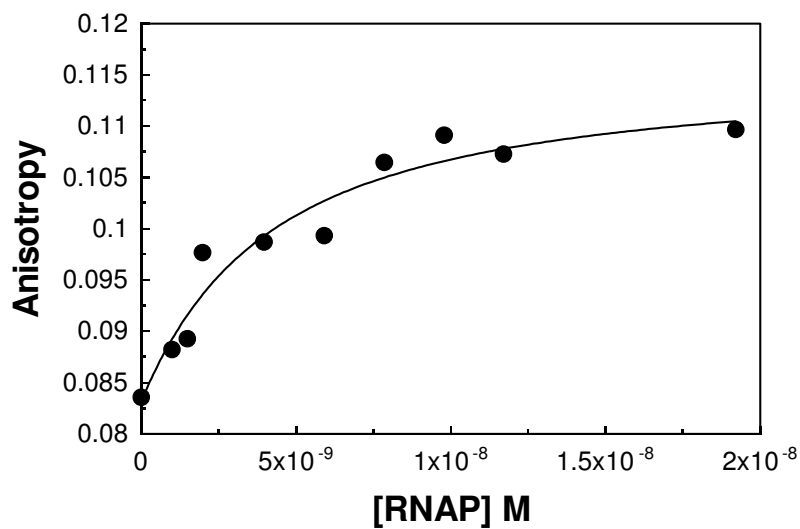

B

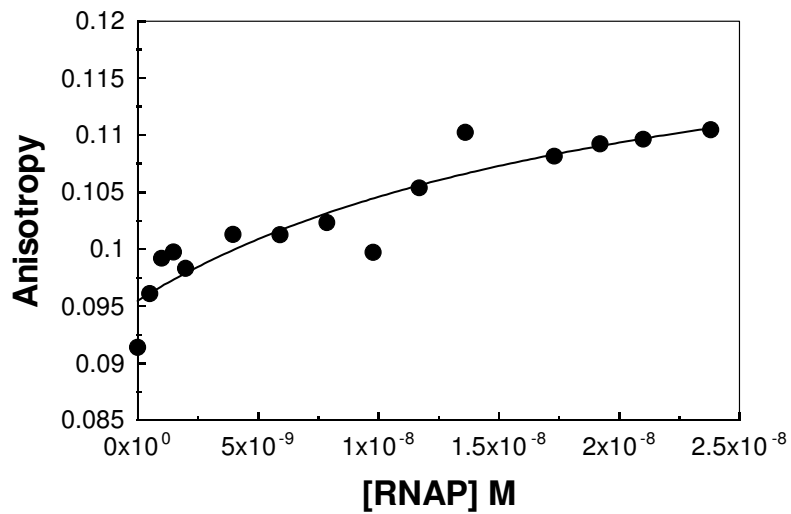

Figure S2: Netropsin Binding to the closed-complex. 2 nM labeled galP1<sup>+</sup>P2<sup>-</sup>P3<sup>+</sup> (P1) was incubated with saturating concentration of RNA polymerase at 4°C for 15 minutes and then titrated with netropsin. The titrations were carried out in 50 mM MES buffer, pH 6.4 containing 0.2 M NaCl, 10 mM MgCl<sub>2</sub>, 100 µg/ml BSA, 1 mM DTT, 1 mM EDTA and 10% glycerol. Fluorescence anisotropy was measured with excitation at 490 nm and emission at 526 nm using bandwidths of 5 nm on both sides.

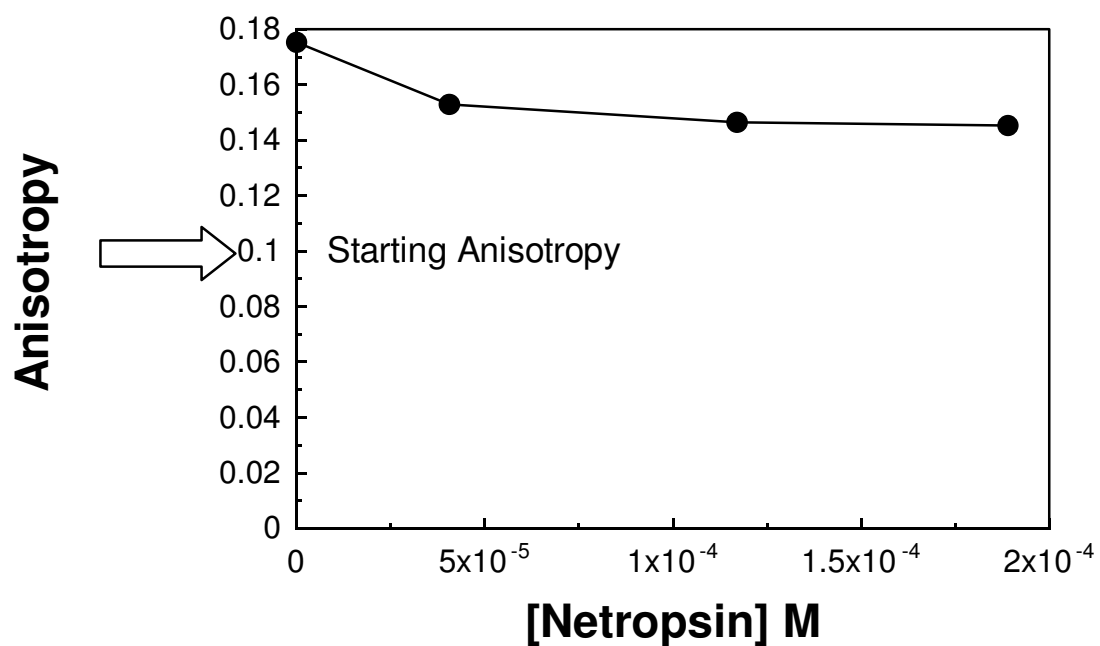

Figure S3: Selective binding isotherms of RNA polymerase and promoters.

A

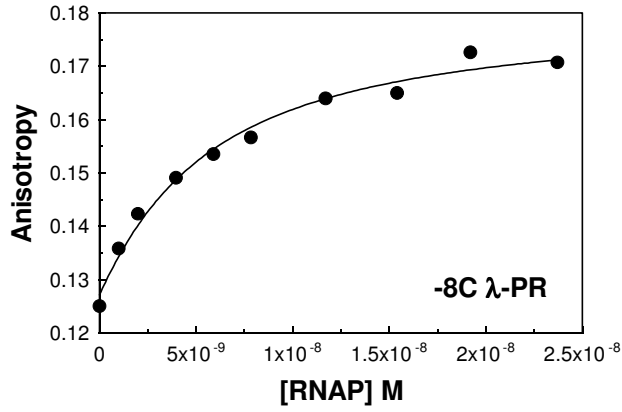

C

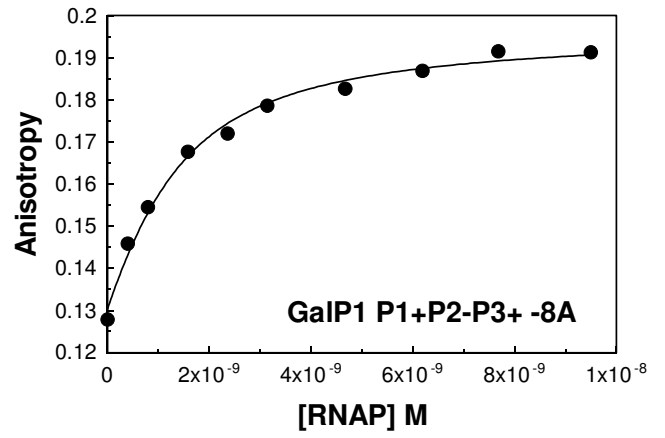

B

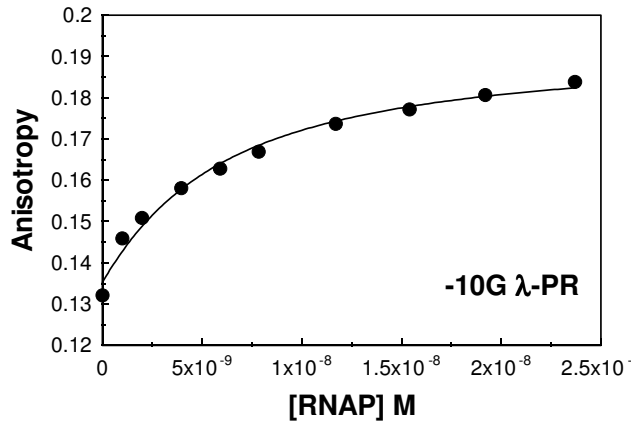

D

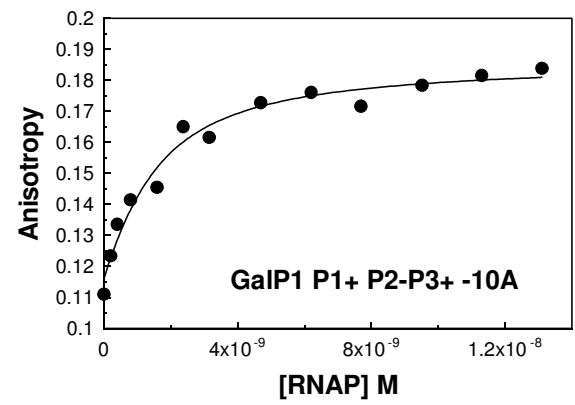

Supplement: supp_gks1018_nar-01740-h-2012-File002.pdf [file supp_gks1018_nar-01740-h-2012-File002.pdf]
