# Supplementary material for: Indirect read-out of the promoter DNA by RNA polymerase in the closed complex
Source: PubMed Central journal article supplement — Nucleic Acids Res. 2012 Oct 31;41(1):366–77. doi: 10.1093/nar/gks1018 (PMC3592454; doi:10.1093/nar/gks1018), 2012-10-31
Supplement: supp_gks1018_nar-01740-h-2012-File003.pdf [file supp_gks1018_nar-01740-h-2012-File003.pdf]

**Table S1**

| Template                                                   | Name      | Sequence                                                                                                                                                                                     |
|------------------------------------------------------------|-----------|----------------------------------------------------------------------------------------------------------------------------------------------------------------------------------------------|
| <b>galP1<sup>+</sup>P2<sup>+</sup>P3<sup>+</sup></b>       | P1-WT     | 5'-TTT TCG CAT CTT TGT TAT GCT ATG GTT ATT TCA TAC CAT AAG CCT AAT<br>GGA GCG AAT TAT GAG-3'<br>3'-AAA AGC GTA GAA ACA ATA CGA TAC CAA TAA AGT ATG GTA TTC GGA TTA<br>CCT CGC TTA ATA CTC-5' |
| <b>galP1<sup>+</sup>P2<sup>+</sup>P3<sup>+</sup></b>       | P1        | 5'-TTT TCG CAT CTT TTC GTT GCT ATG GTT ATT TCA TAC CAT AAG CCT AAT<br>GGA GCG AAT TAT GAG-3'<br>3'-AAA AGC GTA GAA AAG CAA CGA TAC CAA TAA AGT ATG GTA TTC GGA TTA<br>CCT CGC TTA ATA CTC-5' |
| <b>galP1(T-15G)P2<sup>+</sup>P3<sup>+</sup></b>            | P1T15G    | 5'-TTT TCG CAT CTT TTC GTG GCT ATG GTT ATT TCA TAC CAT AAG CCT AAT<br>GGA GCG AAT TAT GAG-3'<br>3'-AAA AGC GTA GAA AAG CAC CGA TAC CAA TAA AGT ATG GTA TTC GGA TTA<br>CCT CGC TTA ATA CTC-5' |
| <b>galP1(G-14T)P2<sup>+</sup>P3<sup>+</sup></b>            | P1G14T    | 5'-TTT TCG CAT CTT TTC GTT TCT ATG GTT ATT TCA TAC CAT AAG CCT AAT<br>GGA GCG AAT TAT GAG-3'<br>3'-AAA AGC GTA GAA AAG CAA AGA TAC CAA TAA AGT ATG GTA TTC GGA TTA<br>CCT CGC TTA ATA CTC-5' |
| <b>galP1(C-13A)P2<sup>+</sup>P3<sup>+</sup></b>            | P1C13A    | 5'-TTT TCG CAT CTT TTC GTT GAT ATG GTT ATT TCA TAC CAT AAG CCT AAT GGA<br>GCG AAT TAT GAG-3'<br>3'-AAA AGC GTA GAA AAG CAA CTA TAC CAA TAA AGT ATG GTA TTC GGA TTA<br>CCT CGC TTA ATA CTC-5' |
| <b>galP1(T-12G)P2<sup>+</sup>P3<sup>+</sup></b>            | P1T12G    | 5'-TTT TCG CAT CTT TTC GTT GCG ATG GTT ATT TCA TAC CAT AAG CCT AAT<br>GGA GCG AAT TAT GAG-3'<br>3'-AAA AGC GTA GAA AAG CAA CGC TAC CAA TAA AGT ATG GTA TTC GGA TTA<br>CCT CGC TTA ATA CTC-5' |
| <b>galP1(A-11C)P2<sup>+</sup>P3<sup>+</sup></b>            | P1A11C    | 5'-TTT TCG CAT CTT TTC GTT GCT CTG GTT ATT TCA TAC CAT AAG CCT AAT<br>GGA GCG AAT TAT GAG-3'<br>3'-AAA AGC GTA GAA AAG CAA CGA GAC CAA TAA AGT ATG GTA TTC GGA TTA<br>CCT CGC TTA ATA CTC-5' |
| <b>galP1(T-10G)P2<sup>+</sup>P3<sup>+</sup></b>            | P1T10G    | 5'-TTT TCG CAT CTT TTC GTT GCT AGG GTT ATT TCA TAC CAT AAG CCT AAT<br>GGA GCG AAT TAT GAG-3'<br>3'-AAA AGC GTA GAA AAG CAA CGA TCC CAA TAA AGT ATG GTA TTC GGA TTA<br>CCT CGC TTA ATA CTC-5' |
| <b>galP1(G-9T)P2<sup>+</sup>P3<sup>+</sup></b>             | P1G9T     | 5'-TTT TCG CAT CTT TTC GTT GCT ATT GTT ATT TCA TAC CAT AAG CCT AAT<br>GGA GCG AAT TAT GAG-3'<br>3'-AAA AGC GTA GAA AAG CAA CGA TAA CAA TAA AGT ATG GTA TTC GGA TTA<br>CCT CGC TTA ATA CTC-5' |
| <b>galP1(G-8T)P2<sup>+</sup>P3<sup>+</sup></b>             | P1G8T     | 5'-TTT TCG CAT CTT TTC GTT GCT ATG TTT ATT TCA TAC CAT AAG CCT AAT<br>GGA GCG AAT TAT GAG-3'<br>3'-AAA AGC GTA GAA AAG CAA CGA TAC AAA TAA AGT ATG GTA TTC GGA TTA<br>CCT CGC TTA ATA CTC-5' |
| <b>galP1(T-7G)P2<sup>+</sup>P3<sup>+</sup></b>             | P1T7G     | 5'-TTT TCG CAT CTT TTC GTT GCT ATG GGT ATT TCA TAC CAT AAG CCT AAT<br>GGA GCG AAT TAT GAG-3'<br>3'-AAA AGC GTA GAA AAG CAA CGA TAC CCA TAA AGT ATG GTA TTC GGA TTA<br>CCT CGC TTA ATA CTC-5' |
| <b>galP1(G-14T,T-10G,G-8T)P2<sup>+</sup>P3<sup>+</sup></b> | P1TripleM | 5'-TTT TCG CAT CTT TTC GTT TCT AGG TTT ATT TCA TAC CAT AAG CCT AAT<br>GGA GCG AAT TAT GAG-3'<br>3'-AAA AGC GTA GAA AAG CAA AGA TCC AAA TAA AGT ATG GTA TTC GGA TTA<br>CCT CGC TTA ATA CTC-5' |
| <b>galP1<sup>-</sup>P2<sup>-</sup>P3<sup>+</sup></b>       | P1Minus   | 5'-TTT TCG CAT CTT TTC GTT ACT GCC CCT ATT TCA TAC CAT AAG CCT AAT<br>GGA GCG AAT TAT GAG-3'<br>3'-AAA AGC GTA GAA AAG CAA TGA CGG GGA TAA AGT ATG GTA TTC GGA TTA<br>CCT CGC TTA ATA CTC-5' |

**Table S2**

| Template                                                                | Name    | Sequence                                                                                                                                                                                     |
|-------------------------------------------------------------------------|---------|----------------------------------------------------------------------------------------------------------------------------------------------------------------------------------------------|
| <i>galP1</i> <sup>+</sup> <i>P2</i> <sup>-</sup> <i>P3</i> <sup>-</sup> | P1*     | 5'-TTT TCG CAT CTT TTT TAG GAT ATG GTT ATT TAA TAA CCT AAG CCT AAT GGA GCG AAT<br>TAT GAG-3'<br>3'-AAA AGC GTA GAA AAA ATC CTA TAC CAA TAA ATT ATT GGA TTC GGA TTA CCT CGC TTA<br>ATA CTC-5' |
| <i>galP1</i> (G-14T) <i>P2</i> <sup>-</sup> <i>P3</i> <sup>-</sup>      | P1*G14T | 5'-TTT TCG CAT CTT TTT TAG TAT ATG GTT ATT TAA TAA CCT AAG CCT AAT GGA GCG AAT<br>TAT GAG-3'<br>3'-AAA AGC GTA GAA AAA ATC ATA TAC CAA TAA ATT ATT GGA TTC GGA TTA CCT CGC TTA<br>ATA CTC-5' |
| <i>galP1</i> (T-12G) <i>P2</i> <sup>-</sup> <i>P3</i> <sup>-</sup>      | P1*T12G | 5'-TTT TCG CAT CTT TTT TAG GAG ATG GTT ATT TAA TAA CCT AAG CCT AAT GGA GCG AAT<br>TAT GAG-3'<br>3'-AAA AGC GTA GAA AAA ATC CTC TAC CAA TAA ATT ATT GGA TTC GGA TTA CCT CGC TTA<br>ATA CTC-5' |
| <i>galP1</i> (A-11C) <i>P2</i> <sup>-</sup> <i>P3</i> <sup>-</sup>      | P1*A11C | 5'-TTT TCG CAT CTT TTT TAG GAT CTG GTT ATT TAA TAA CCT AAG CCT AAT GGA GCG AAT<br>TAT GAG-3'<br>3'-AAA AGC GTA GAA AAA ATC CTA GAC CAA TAA ATT ATT GGA TTC GGA TTA CCT CGC TTA<br>ATA CTC-5' |
| <i>galP1</i> (T-10G) <i>P2</i> <sup>-</sup> <i>P3</i> <sup>-</sup>      | P1*T10G | 5'-TTT TCG CAT CTT TTT TAG GAT AGG GTT ATT TAA TAA CCT AAG CCT AAT GGA GCG AAT<br>TAT GAG-3'<br>3'-AAA AGC GTA GAA AAA ATC CTA TCC CAA TAA ATT ATT GGA TTC GGA TTA CCT CGC TTA<br>ATA CTC-5' |
| <i>galP1</i> (G-8T) <i>P2</i> <sup>-</sup> <i>P3</i> <sup>-</sup>       | P1*G8T  | 5'-TTT TCG CAT CTT TTT TAG GAT ATG TTT ATT TAA TAA CCT AAG CCT AAT GGA GCG AAT<br>TAT GAG-3'<br>3'-AAA AGC GTA GAA AAA ATC CTA TAC AAA TAA ATT ATT GGA TTC GGA TTA CCT CGC TTA<br>ATA CTC-5' |

**Table S3**

| Template                                               | Name              | Sequence                                                               |
|--------------------------------------------------------|-------------------|------------------------------------------------------------------------|
| <i>galP1</i> <sup>+</sup> <i>P2</i> <sup>-</sup>       | P1-21             | 5'-TTC GTT GCT ATG GTT ATT TCA-3'<br>3'-AAG CAA CGA TAC CAA TAA AGT-5' |
| <i>galP1</i> (G-14T,T-10G,G-8T) <i>P2</i> <sup>-</sup> | P1-21-<br>TripleM | 5'-TTC GTT TCT AGG TTT ATT TCA-3'<br>3'-AAG CAA AGA TCC AAA TAA AGT-5' |
| poly-dAT                                               | dAT-20            | 5'-AAA AAA TTT ATT TTA AAT TT-3'<br>3'-TTT TTT AAA TAA AAT TTA AA-5'   |

*P1*<sup>+</sup> means (G-14A, A-11G, T-10C, G-9C, G-8C, T-7C, indicated by blue colour) with respect to +1P1. *P2*<sup>-</sup> means (G-14T, T-13C, T-12G, A-11T, indicated by green colour) with respect to +1P2. *P2*<sup>-</sup> means (G-14T, T-10G, C-8A, indicated by pink colour) with respect to +1P2. *P3*<sup>-</sup> means (C-14A, C-10A, A-8C, indicated by orange colour) with respect to +1P3. Red colour indicated point mutation at *P1*.

**Table S4**

| <b>TEMPLATE</b>                | <b>NAME</b> | <b>SEQUENCE</b>                                                                                                                                                                                                                      |
|--------------------------------|-------------|--------------------------------------------------------------------------------------------------------------------------------------------------------------------------------------------------------------------------------------|
| <b><math>P_R</math>(WT)</b>    | PR          | 5'-GCG TGT TGA CTA TTT TAC CTC TGG CGG TGA TAA TGG TTG CAT GTA CTA AGG AGG TTG TAT GGA<br>ACA ACG CA-3'<br><br>3'-CGC ACA ACT GAT AAA ATG GAG ACC GCC ACT ATT ACC AAC GTA CAT GAT TCC TCC AAC ATA CCT<br>TGT TGC GT-5'               |
| <b><math>P_R</math>(G-15T)</b> | PRG15T      | 5'-GCG TGT TGA CTA TTT TAC CTC TGG <b>CTG</b> TGA TAA TGG TTG CAT GTA CTA AGG AGG TTG TAT GGA<br>ACA ACG CA-3'<br><br>3'-CGC ACA ACT GAT AAA ATG GAG ACC <b>GAC</b> ACT ATT ACC AAC GTA CAT GAT TCC TCC AAC ATA CCT<br>TGT TGC GT-5' |
| <b><math>P_R</math>(G-14T)</b> | PRG14T      | 5'-GCG TGT TGA CTA TTT TAC CTC TGG <b>CGT</b> TGA TAA TGG TTG CAT GTA CTA AGG AGG TTG TAT GGA<br>ACA ACG CA-3'<br><br>3'-CGC ACA ACT GAT AAA ATG GAG ACC <b>GCA</b> ACT ATT ACC AAC GTA CAT GAT TCC TCC AAC ATA CCT<br>TGT TGC GT-5' |
| <b><math>P_R</math>(T-13G)</b> | PRT13G      | 5'-GCG TGT TGA CTA TTT TAC CTC TGG CGG <b>GGA</b> TAA TGG TTG CAT GTA CTA AGG AGG TTG TAT GGA<br>ACA ACG CA-3'<br><br>3'-CGC ACA ACT GAT AAA ATG GAG ACC GCC <b>CCT</b> ATT ACC AAC GTA CAT GAT TCC TCC AAC ATA CCT<br>TGT TGC GT-5' |
| <b><math>P_R</math>(G-12T)</b> | PRG12T      | 5'-GCG TGT TGA CTA TTT TAC CTC TGG CGG <b>TA</b> TAA TGG TTG CAT GTA CTA AGG AGG TTG TAT GGA<br>ACA ACG CA-3'<br><br>3'-CGC ACA ACT GAT AAA ATG GAG ACC GCC <b>AAT</b> ATT ACC AAC GTA CAT GAT TCC TCC AAC ATA CCT<br>TGT TGC GT-5'  |
| <b><math>P_R</math>(A-11C)</b> | PRA11C      | 5'-GCG TGT TGA CTA TTT TAC CTC TGG CGG <b>TGC</b> TAA TGG TTG CAT GTA CTA AGG AGG TTG TAT GGA<br>ACA ACG CA-3'<br><br>3'-CGC ACA ACT GAT AAA ATG GAG ACC GCC <b>ACG</b> ATT ACC AAC GTA CAT GAT TCC TCC AAC ATA CCT<br>TGT TGC GT-5' |
| <b><math>P_R</math>(T-10G)</b> | PRT10G      | 5'-GCG TGT TGA CTA TTT TAC CTC TGG CGG TGA <b>GAA</b> TGG TTG CAT GTA CTA AGG AGG TTG TAT GGA<br>ACA ACG CA-3'<br>3'-CGC ACA ACT GAT AAA ATG GAG ACC GCC ACT <b>CTT</b> ACC AAC<br>GTA CAT GAT TCC TCC AAC ATA CCT TGT TGC GT-5'     |
| <b><math>P_R</math>(A-9C)</b>  | PRA9C       | 5'-GCG TGT TGA CTA TTT TAC CTC TGG CGG TGA <b>TCA</b> TGG TTG CAT GTA CTA AGG AGG TTG TAT GGA<br>ACA ACG CA-3'<br><br>3'-CGC ACA ACT GAT AAA ATG GAG ACC GCC ACT <b>AGT</b> ACC AAC GTA CAT GAT TCC TCC AAC ATA CCT<br>TGT TGC GT-5' |
| <b><math>P_R</math>(A-8C)</b>  | PRA8C       | 5'-GCG TGT TGA CTA TTT TAC CTC TGG CGG TGA <b>TAC</b> TGG TTG CAT GTA CTA AGG AGG TTG TAT GGA<br>ACA ACG CA-3'<br><br>3'-CGC ACA ACT GAT AAA ATG GAG ACC GCC ACT <b>ATG</b> ACC AAC GTA CAT GAT TCC TCC AAC ATA CCT<br>TGT TGC GT-5' |
| <b><math>P_R</math>(T-7C)</b>  | PRT7C       | 5'-GCG TGT TGA CTA TTT TAC CTC TGG CGG TGA TAA <b>CGG</b> TTG CAT GTA CTA AGG AGG TTG TAT GGA<br>ACA ACG CA-3'<br><br>3'-CGC ACA ACT GAT AAA ATG GAG ACC GCC ACT ATT <b>GCC</b> AAC GTA CAT GAT TCC TCC AAC ATA CCT                  |

| TGT TGC GT-5'                                       |         |                                                                                                                                                                                                              |
|-----------------------------------------------------|---------|--------------------------------------------------------------------------------------------------------------------------------------------------------------------------------------------------------------|
| <b><math>P_R(\text{G-12T}, \text{T-7C})</math></b>  | PRMT7C  | 5'-GCG TGT TGA CTA TTT TAC CTC TGG CGG TTA TAA CGG TTG CAT GTA CTA AGG AGG TTG TAT GGA ACA ACG CA-3'<br>3'-CGC ACA ACT GAT AAA ATG GAG ACC GCC AAT ATT GCC AAC GTA CAT GAT TCC TCC AAC ATA CCT TGT TGC GT-5' |
| <b><math>P_R(\text{G-12T}, \text{A-11C})</math></b> | PRMA11C | 5'-GCG TGT TGA CTA TTT TAC CTC TGG CGG TTC TAA TGG TTG CAT GTA CTA AGG AGG TTG TAT GGA ACA ACG CA-3'<br>3'-CGC ACA ACT GAT AAA ATG GAG ACC GCC AAG ATT ACC AAC GTA CAT GAT TCC TCC AAC ATA CCT TGT TGC GT-5' |
| <b><math>P_R(\text{G-12T}, \text{T-35C})</math></b> | PRMT35C | 5'-GCG TGC TGA CTA TTT TAC CTC TGG CGG TTA TAA TGG TTG CAT GTA CTA AGG AGG TTG TAT GGA ACA ACG CA-3'<br>3'-CGC ACG ACT GAT AAA ATG GAG ACC GCC AAT ATT ACC AAC GTA CAT GAT TCC TCC AAC ATA CCT TGT TGC GT-5' |

**Table S5**

| <b>Template</b>                                                            | <b>Name</b> | <b><math>K_d^{\text{act}}</math> (nM), 4<sup>o</sup>C</b> |
|----------------------------------------------------------------------------|-------------|-----------------------------------------------------------|
| <b><math>galP1^+P2^+P3^+</math></b>                                        | P1-WT       | 0.66± 0.4                                                 |
| <b><math>galP1^+P2^-P3^+</math></b>                                        | P1          | 1.3±0.2                                                   |
| <b><math>galP1(\text{T-15G})P2^-P3^+</math></b>                            | P1T15G      | 1.8±0.4                                                   |
| <b><math>galP1(\text{G-14T})P2^-P3^+</math></b>                            | P1G14T      | 1.6±0.2                                                   |
| <b><math>galP1(\text{C-13A})P2^-P3^+</math></b>                            | P1C13A      | 0.9±0.1                                                   |
| <b><math>galP1(\text{T-12G})P2^-P3^+</math></b>                            | P1T12G      | 1.4±0.2                                                   |
| <b><math>galP1(\text{A-11C})P2^-P3^+</math></b>                            | P1A11C      | 1.6±0.4                                                   |
| <b><math>galP1(\text{T-10G})P2^-P3^+</math></b>                            | P1T10G      | 5.9±1.0                                                   |
| <b><math>galP1(\text{G-9T})P2^-P3^+</math></b>                             | P1G9T       | 1.2±0.2                                                   |
| <b><math>galP1(\text{G-8T})P2^-P3^+</math></b>                             | P1G8T       | 3.2±0.4                                                   |
| <b><math>galP1(\text{T-7G})P2^-P3^+</math></b>                             | P1T7G       | 1.2±0.2                                                   |
| <b><math>galP1(\text{G-14T}, \text{T-10G}, \text{G-8T})P2^-P3^+</math></b> | P1TripleM   | 6.0±0.8                                                   |
| <b><math>galP1^-P2^-P3^+</math></b>                                        | P1Minus     | 6.2±0.6                                                   |

**Table S6**

| <i>Template</i>                                      | <i>Name</i> | $K_d^{\text{act}}$ (nM), 4 <sup>o</sup> C |
|------------------------------------------------------|-------------|-------------------------------------------|
| <i>galP1<sup>+</sup>P2<sup>-</sup>P3<sup>-</sup></i> | P1*         | 0.65±0.3                                  |
| <i>galP1(G-14T)P2<sup>-</sup>P3<sup>-</sup></i>      | P1*G14T     | 0.70±0.3                                  |
| <i>galP1(T-12G)P2<sup>-</sup>P3<sup>-</sup></i>      | P1*T12G     | 1.87±0.2                                  |
| <i>galP1(A-11C)P2<sup>-</sup>P3<sup>-</sup></i>      | P1*A11C     | 1.09±0.6                                  |
| <i>galP1(T-10G)P2<sup>-</sup>P3<sup>-</sup></i>      | P1*T10G     | 15.4±11.1                                 |
| <i>galP1(G-8T)P2<sup>-</sup>P3<sup>-</sup></i>       | P1*G8T      | 10.8±6.9                                  |

**Table S7**

| <i>Template</i>                              | <i>Name</i>   | $K_d^{\text{act}}$ (nM), 4 <sup>o</sup> C |
|----------------------------------------------|---------------|-------------------------------------------|
| <i>galP1<sup>+</sup>P2<sup>-</sup></i>       | P1-21         | 4.4±1.6                                   |
| <i>galP1(G-14T,T-10G,G-8T)P2<sup>-</sup></i> | P1-21-TripleM | >38.5                                     |

**Table S8**

| <i>Template</i>                                      | <i>Name</i> | $K_d^{\text{act}}$ (nM), 0 <sup>o</sup> C |
|------------------------------------------------------|-------------|-------------------------------------------|
| <i>galP1<sup>+</sup>P2<sup>-</sup>P3<sup>+</sup></i> | P1          | 0.87±0.2                                  |
| <i>galP1(G-14T)P2<sup>-</sup>P3<sup>+</sup></i>      | P1G14T      | 1.64±0.4                                  |
| <i>galP1(T-10G)P2<sup>-</sup>P3<sup>+</sup></i>      | P1T10G      | 2.4±0.8                                   |
| <i>galP1(G-8T)P2<sup>-</sup>P3<sup>+</sup></i>       | P1G8T       | 2.3±0.4                                   |

**Table S9**

| <b>TEMPLATE</b>                             | <b>NAME</b> | <b><math>K_d^{\text{act}}</math> (nM), 4<sup>0</sup>C</b> |
|---------------------------------------------|-------------|-----------------------------------------------------------|
| <b><math>P_R(\text{WT})</math></b>          | PR          | 7.7±0.3                                                   |
| <b><math>P_R(\text{T-13G})</math></b>       | PRT13G      | 15.5±2.4                                                  |
| <b><math>P_R(\text{G-12T})</math></b>       | PRG12T      | 4.5±0.4                                                   |
| <b><math>P_R(\text{A-11C})</math></b>       | PRA11C      | 6.0±1.7                                                   |
| <b><math>P_R(\text{T-10G})</math></b>       | PRT10G      | 6.8±1.1                                                   |
| <b><math>P_R(\text{A-9C})</math></b>        | PRA9C       | 6.3±0.9                                                   |
| <b><math>P_R(\text{A-8C})</math></b>        | PRA8C       | 5.9±1.4                                                   |
| <b><math>P_R(\text{T-7C})</math></b>        | PRT7C       | 7.0±1.6                                                   |
| <b><math>P_R(\text{G-12T,T-7C})</math></b>  | PRMT7C      | 8.6±2.0                                                   |
| <b><math>P_R(\text{G-12T,A-11C})</math></b> | PRMA11C     | 10.2±3.9                                                  |
| <b><math>P_R(\text{G-12T,T-35C})</math></b> | PRMT35C     | 12.0±1.5                                                  |

**Table S10**

| <b>Template</b>                                 | <b>Name</b> | <b>Q437A, <math>K_d^{\text{act}}</math> (nM), 4<sup>0</sup>C</b> |
|-------------------------------------------------|-------------|------------------------------------------------------------------|
| <b><math>galP1^+P2^-P3^+</math></b>             | P1          | 0.76±0.1                                                         |
| <b><math>galP1(\text{G-8T})P2^-P3^+</math></b>  | P1G8T       | 4.4±1.2                                                          |
| <b><math>galP1(\text{T-10G})P2^-P3^+</math></b> | P1T10G      | 9.4±3.4                                                          |
| <b><math>galP1(\text{G-14T})P2^-P3^+</math></b> | P1G14T      | 0.38±0.1                                                         |
| <b><math>galP1(\text{T-15G})P2^-P3^+</math></b> | P1T15G      | 0.94±0.1                                                         |

**Table S11**

| <b>Template</b>                                      | <b>Name</b> | <b>R436A, <math>K_d^{act}</math> (nM), 4°C</b> |
|------------------------------------------------------|-------------|------------------------------------------------|
| <i>galP1<sup>+</sup>P2<sup>-</sup>P3<sup>+</sup></i> | P1          | 1.35±0.1                                       |
| <i>galP1(G-8T)P2<sup>-</sup>P3<sup>+</sup></i>       | P1G8T       | 7.4±2.3                                        |
| <i>galP1(T-10G)P2<sup>-</sup>P3<sup>+</sup></i>      | P1T10G      | 6.4±2.1                                        |
| <i>galP1(G-14T)P2<sup>-</sup>P3<sup>+</sup></i>      | P1G14T      | 1.2±0.2                                        |
| <i>galP1(T-15G)P2<sup>-</sup>P3<sup>+</sup></i>      | P1T15G      | 2.6±0.7                                        |

Each binding constant presented in Tables S5-S11 is an average of at least 3 independent determinations. The uncertainty values are the SEM.
